# Supplementary material for: Development of CaCO3 microsphere-based composite hydrogel for dual delivery of growth factor and Ca to enhance bone regeneration
Source: Royal Society of Chemistry journal article supplement (doi:10.1039/c9bm00463g), 2019-01-01
Supplement: c9bm00463g1.pdf [file c9bm00463g1.pdf]

Supporting information for:

**Development of CaCO<sub>3</sub> microspheres based composite hydrogel for dual delivery of growth factor and Ca to enhance bone regeneration**

Yihong Gong,<sup>a,b</sup> Yiling Zhang,<sup>a,b</sup> Zhinan Cao,<sup>a,b</sup> Feng Ye,<sup>c</sup> Zefeng Lin,<sup>d,e</sup> and Yan Li<sup>a,b\*</sup>

<sup>a</sup>Guangdong Provincial Key Laboratory of Sensor Technology and Biomedical Instrument, School of Biomedical Engineering, Sun Yat-sen University, Guangzhou, Guangdong, P.R. China

<sup>b</sup>Guangdong Provincial Engineering and Technology Center of Advanced and Portable Medical Devices, Sun Yat-sen University, Guangzhou, Guangdong, P.R. China

<sup>c</sup>Department of Pharmacology, Beijing Anzhen Hospital, Capital Medical University, Beijing Institute of Heart, Lung and Blood Vessel Disease, Beijing, P.R. China

<sup>d</sup>Department of Orthopedics, Guangzhou General Hospital of Guangzhou Military Command, Guangzhou, 510010, China.

<sup>e</sup>Guangdong Key Laboratory of Orthopedic Technology and Implant Materials, Guangzhou, 510010, China.

\*Corresponding author: Yan Li, Telephone: +86-20-39332146, Fax: +86-20-39332146, Email: liyan99@mail.sysu.edu.cn

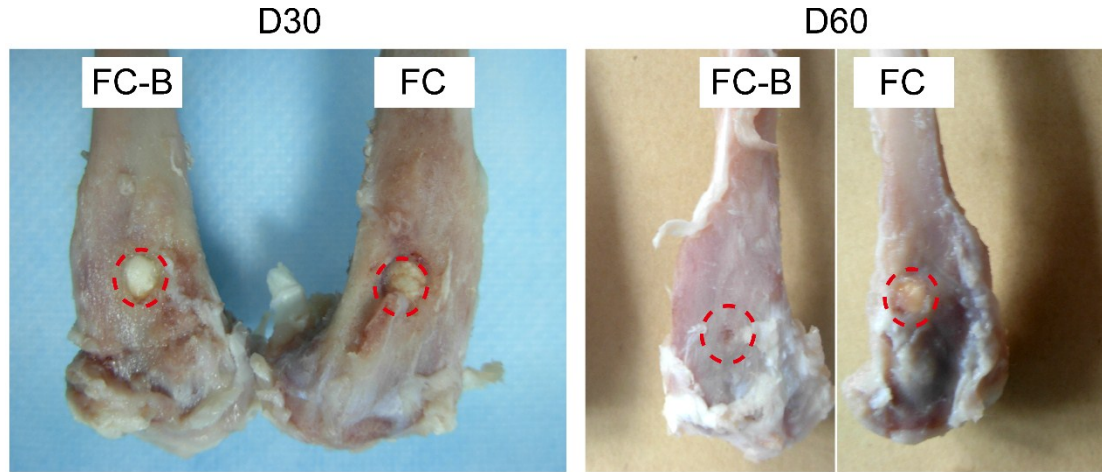

Figure S1. Digital images of tibia bone tissue with created defects after implanting  $\text{CaCO}_3$ /fibrin-glue composite hydrogels for (A) 30 days and (B) 60 days. FC-B was  $\text{CaCO}_3$ /fibrin-glue composite hydrogel with BMP-2 and FC was  $\text{CaCO}_3$ /fibrin-glue composite hydrogel without BMP-2.

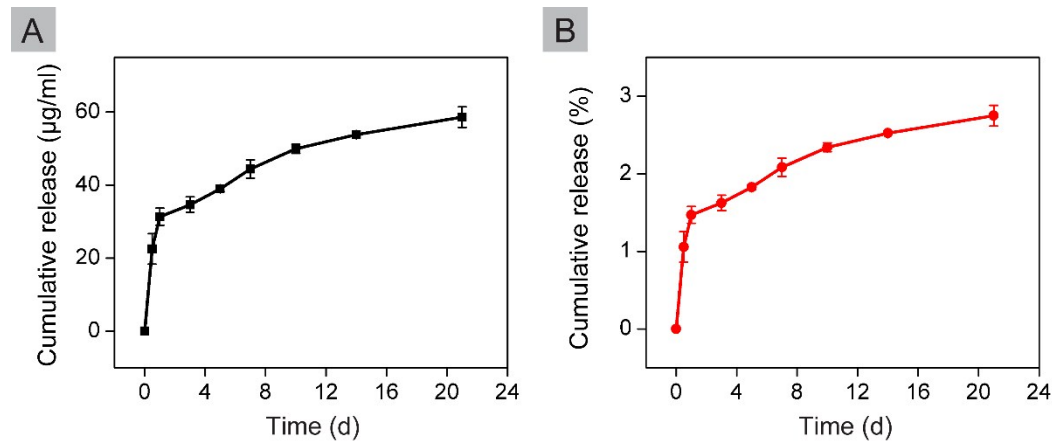

Figure S2. Cumulative release of (A)  $\text{Ca}^{2+}$  and (B)  $\text{CaCO}_3$  from casein and heparin co-functionalized  $\text{CaCO}_3$  microspheres. After sterilization (soaking in 75% ethanol and then UV radiation), 16 mg  $\text{CaCO}_3$  microspheres were suspended in 3 ml PBS solution containing 1% (v/v) penicillin/streptomycin and then incubated in 37°C water bath. At predetermined time points, 1.5 ml solution was taken out and replenished with fresh PBS.  $\text{Ca}^{2+}$  concentration was quantified using a Calcium-O-Cresolphthalein complexone method and the released amount of  $\text{CaCO}_3$  was calculated accordingly by assuming that only  $\text{Ca}^{2+}$  and  $\text{CO}_3^{2-}$  ions were released from microspheres. Three replicates were prepared. Data = mean  $\pm$  SD.
